# Supplementary material for: Identification and targeting of a HES1‐YAP1‐CDKN1C functional interaction in fusion‐negative rhabdomyosarcoma
Source: PubMed Central journal article supplement (PMC9580881; doi:10.1002/1878-0261.13304), 2022-08-29
Supplement: MOL2-16-3587-s002.pdf [file MOL2-16-3587-s002.pdf]

**Supplemental Table S2: IHC antibodies**

| <b>Antibody</b> | <b>Vendor - Cat</b>    | <b>Dilution</b> |
|-----------------|------------------------|-----------------|
| HES1            | Santa Cruz - sc-166410 | 1:200           |
| Ki67            | Abcam - ab16667        | 1:200           |
| MYOD1           | Dako - M3512           | 1:200           |
| MYOG            | Dako - M3559           | 1:200           |
