# Supplementary material for: Identification and targeting of a HES1‐YAP1‐CDKN1C functional interaction in fusion‐negative rhabdomyosarcoma
Source: PubMed Central journal article supplement (PMC9580881; doi:10.1002/1878-0261.13304), 2022-08-29
Supplement: MOL2-16-3587-s003.pdf [file MOL2-16-3587-s003.pdf]

**Supplemental Table 1: RT-qPCR primers**

| <b>Gene</b> | <b>For</b>            | <b>Rev</b>             |
|-------------|-----------------------|------------------------|
| RPL32       | GGAGCGACTGCTACGGAAG   | GATACTGTCCAAAAGGCTGGAA |
| B2M         | GAGGCTATCCAGCGTACTCCA | CGGCAGGCATACTCATCTTTT  |
| HES1        | TCAACACGACACCGGATAAAC | GCCGCGAGCTATCTTTCTTCA  |
| YAP1        | CCTTCTTCAAGCCGCCGGAG  | CAGTGTCCCAGGAGAAACAGC  |
| CDKN1C      | AGAGATCAGCGCCTGAGAAG  | GGGCTCTTTGGGCTCTAAAC   |
| WWTR1       | GGCTGGGAGATGACCTTCAC  | CTGAGTGGGGTGGTTCTGCT   |
| MYOD1       | GGTCCCTCGCGCCCAAAGAT  | CAGTTCTCCCGCCTCTCCTAC  |
| MYOG        | CAGTGCACTGGAGTTCAGCG  | TTCATCTGGGAAGGCCACAGA  |
| MRF4        | CCCCTTCAGCTACAGACCCAA | CCCCCTGGAATGATCGGAAAC  |
